# Supplementary material
Source: HighWire-hosted journal article supplement (https://jnm.snmjournals.org/highwire/filestream/94854/field_highwire_adjunct_files/0/160937_Supplemental_Data.pdf)

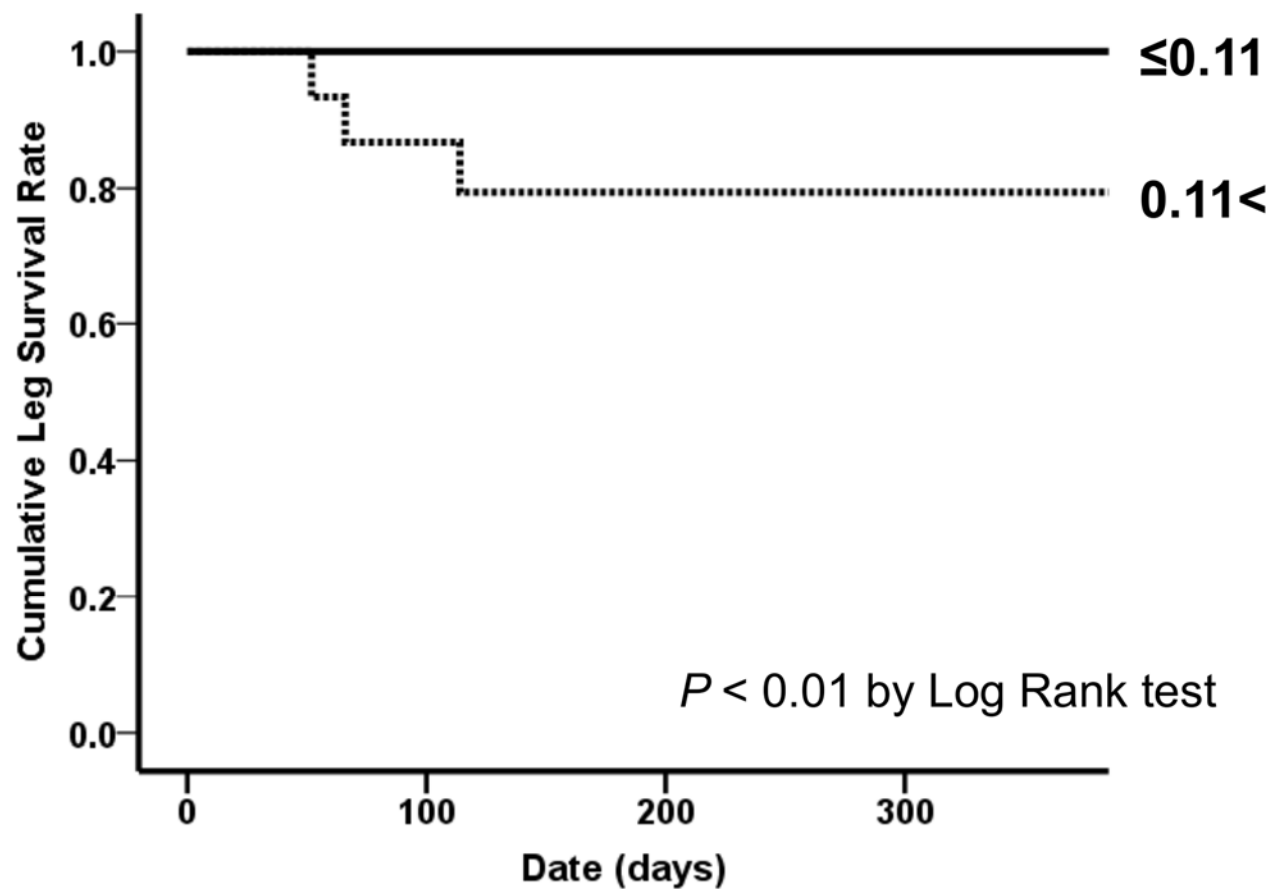

**Supplemental Figure 1:** Kaplan-Meier analysis of amputation-free survival.

Supplement: 160937_Supplemental_Data.pdf [file 160937_Supplemental_Data.pdf]
